# Supplementary material for: Ultrafast photoinduced carrier dynamics in single crystalline perovskite films
Source: Royal Society of Chemistry journal article supplement (doi:10.1039/d2tc03632k), 2023-01-01
Supplement: d2tc03632k1.pdf [file d2tc03632k1.pdf]

1

## Supporting Information

2 **Ultrafast photoinduced carrier dynamics in single crystalline perovskite film**

3 Tianyu Huo,<sup>a</sup> Lihe Yan,<sup>\*a</sup> Jinhai Si,<sup>a</sup> Peipei Ma<sup>a</sup> and Xun Hou<sup>a</sup>

4 <sup>a</sup>Key Laboratory for Physical Electronics and Devices of the Ministry of Education & Shaanxi Key

5 Laboratory of Photonics Technology for Information, School of Electronic science and Engineering,

6 Xi'an Jiaotong University, No.28, Xianning West Road, Xi'an, 710049, China.

7 Correspondence to: liheyang@mail.xjtu.edu.cn(L.H.Yan)

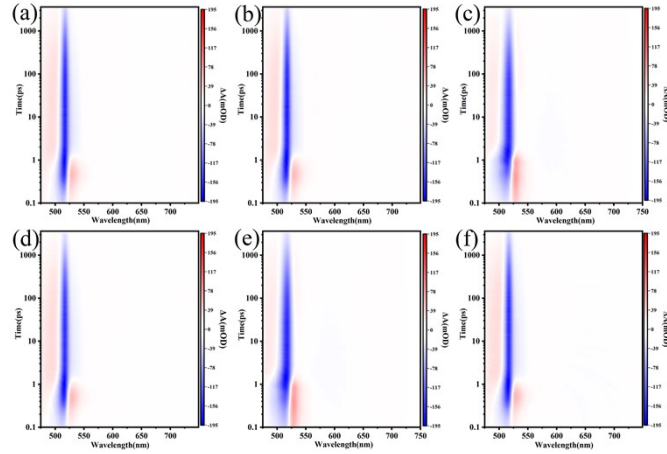

1

2 **Fig. S1** (a-f) Pseudo colour diagram of TA spectra obtained at different test sites of the internal  
3 region of CsPbBr<sub>3</sub> single crystal.

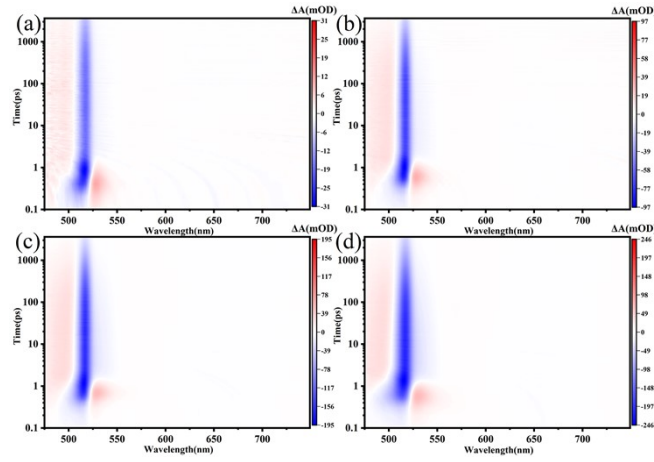

4

5 **Fig. S2** Pseudo colour image of TA spectra acquired at the internal region of CsPbBr<sub>3</sub> single crystal  
6 film under different light injection carrier concentrations  $n_0$ . (a)  $n_0 = 5.66 \times 10^{17} \text{cm}^{-3}$ ; (b)  $n_0 =$   
7  $9.4 \times 10^{17} \text{cm}^{-3}$ ; (c)  $n_0 = 1.89 \times 10^{18} \text{cm}^{-3}$ ; (d)  $n_0 = 2.83 \times 10^{18} \text{cm}^{-3}$ .

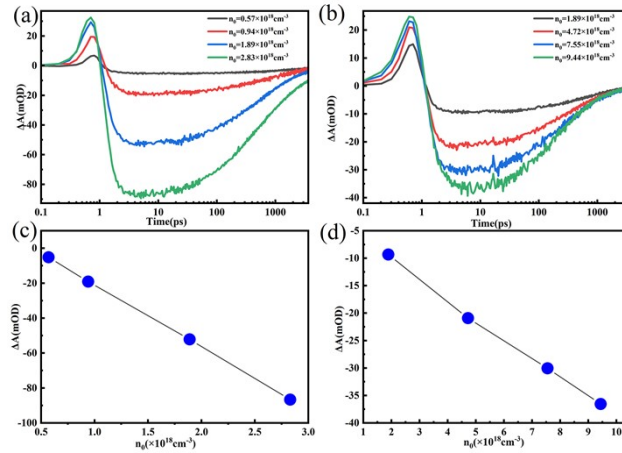

8

9 **Fig. S3** Dynamic process of ground state bleaching signal under different light injection carrier  
10 concentrations at the (a) internal region and at the (b) boundary region. The relationship between  
11 the maximum ground state bleaching signal intensity and the concentration of light injected carriers

1 at the (c) internal region and at the (d) boundary region.

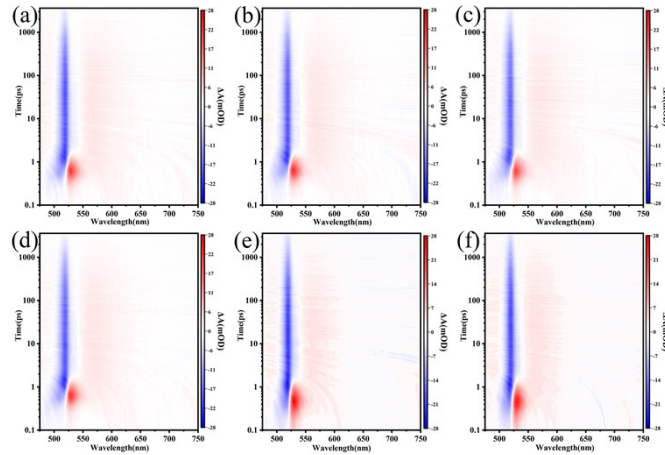

2

3 **Fig. S4** (a-f) Pseudo colour diagram of TA spectra obtained at different test sites of the boundary

4 region of CsPbBr<sub>3</sub> single crystal.

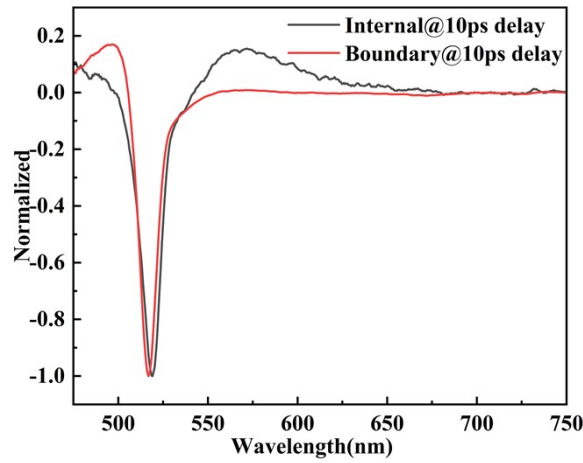

5

6 **Fig. S5** Normalized TA spectra of internal and boundary region at 10 ps delay time.

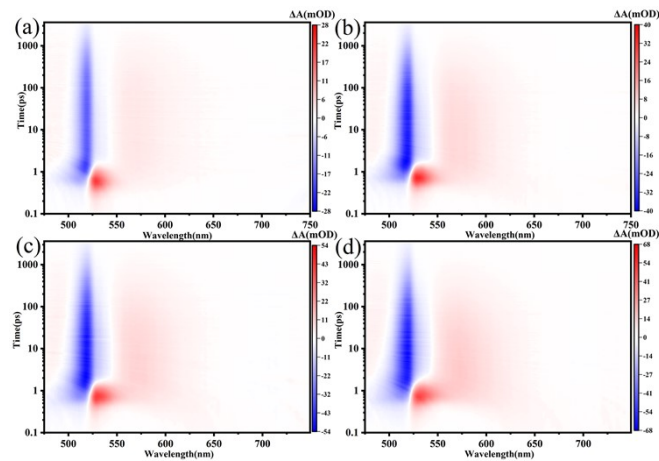

7

8 **Fig. S6** Pseudo colour image of TA spectra acquired at the boundary region of CsPbBr<sub>3</sub> single

9 crystal film under different light injection carrier concentrations  $n_0$ . (a)  $n_0 = 2.83 \times 10^{18} \text{cm}^{-3}$ ; (b)  $n_0 =$

10  $4.72 \times 10^{18} \text{cm}^{-3}$ ; (c)  $n_0 = 7.55 \times 10^{18} \text{cm}^{-3}$ ; (d)  $n_0 = 9.44 \times 10^{18} \text{cm}^{-3}$ .

11

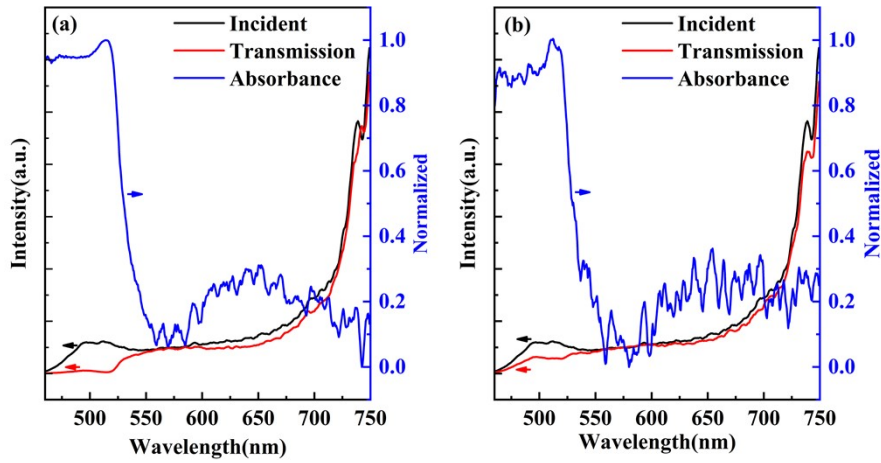

1

2 **Fig. S7** Linear absorption spectra of CsPbBr<sub>3</sub> single crystal film acquired at (a) internal region and

3 (b) boundary region.

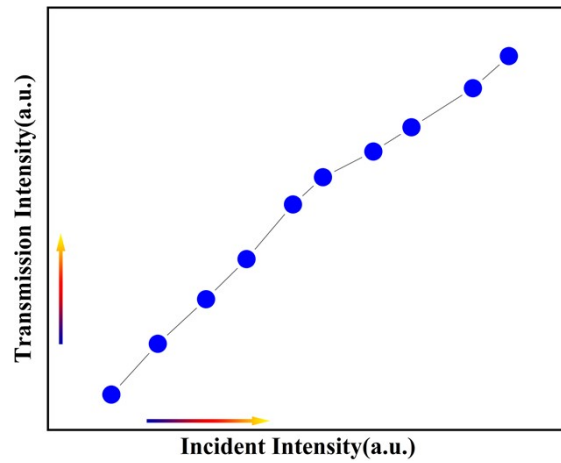

4

5 **Fig. S8** The transmitted light intensity through the sample as a function of the incident light

6 intensity.

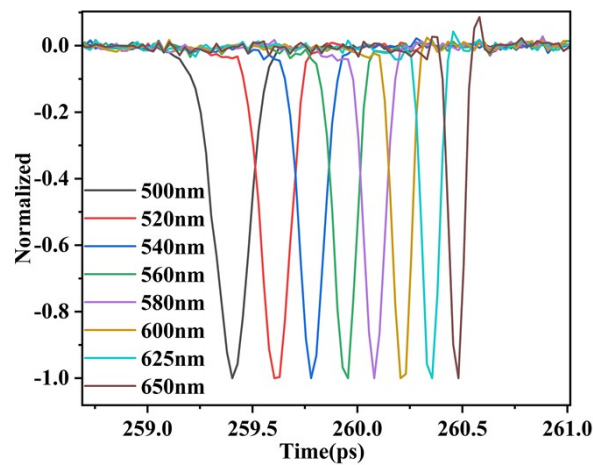

7

8 **Fig. S9** Time characteristics of each wavelength of super continuum white light characterized by

9 optical Kerr gate technique
